# Supplementary material
Source: PubMed Central journal article supplement (PMC7611020)
Supplement: EMS127155-supplement-Supplementary_Materials.pdf [file EMS127155-supplement-Supplementary_Materials.pdf]

**Supplementary Fig. 1: Participant characteristics.** a) distribution of age, gender and days post symptom when sampling of the unexposed healthy controls and SSARS-CoV-2 infected patients studied. b) and c) Comparison of age ( $p=0.3465$ ) and days post symptom ( $p=0.4075$ ) when sampling between the patient groups with mild symptoms and severe symptoms. The unpaired t test with Welch's correction and Mann-Whitney test were used for data analysis of b) and c), respectively. Two tailed p value was calculated.

**a**

|                                 | Unexposed<br>(N=19) | Mild Disease<br>(n=28, 1 asymptomatic) | Severe Disease<br>(n=14, 1 critical) |
|---------------------------------|---------------------|----------------------------------------|--------------------------------------|
| Age, y, median (IQR)            | 46.0(31.0-53.0)     | 53.8(47.6-60.9)                        | 60.6(44.9-74.1)                      |
| Male sex                        | 8(53.33)            | 17(60.71)                              | 9(64.28)                             |
| Days post symptom, median (IQR) | NA                  | 42.5(40.2-55.7)                        | 41.5(40.0-47.5)                      |

**b**

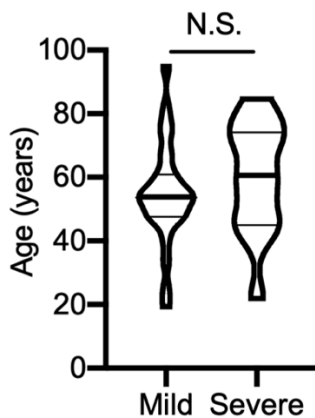

**c**

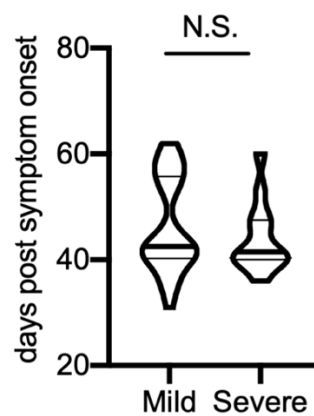

**Supplementary Fig. 2: No correlation between overall T cell response of each individual and the days post symptom when blood specimen was taken.**  $n=42$ . Black and red dots represent patients with history of mild symptoms and severe symptoms, respectively. Spearman's rank correlation coefficient was used for the correlation analysis, two tailed p value was calculated.

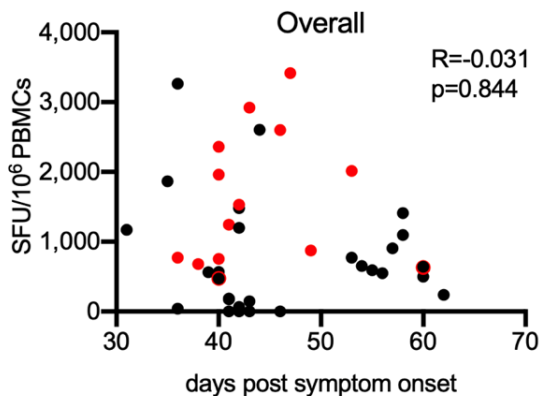

**Supplementary Fig. 3: Magnitude of T cell responses of unexposed healthy individuals against SARS-CoV-2 antigens.** a) An example of IFN- $\gamma$  ELISpot plate from three healthy individuals without SARS-CoV-2 infection. Each individual has been tested with four spike pools (Pool 1-4, Pool 5-8, Pool 9-12 and Pool-13-16), 13 first dimension of non-spike pools and nine dominant individual peptides containing epitopes, along with six control wells including: negative controls with no peptide and peptide pools of irrelevant antigens derived from HIV Gag protein; positive controls with PHA and three pools of known CD8<sup>+</sup> T cell epitopes of human influenza, CMV and EBV viruses (namely FEC controls). b) Magnitude of T cell responses of unexposed healthy individuals against SARS-CoV-2 antigens and control antigens. n=16. Data are presented as median with interquartile range.

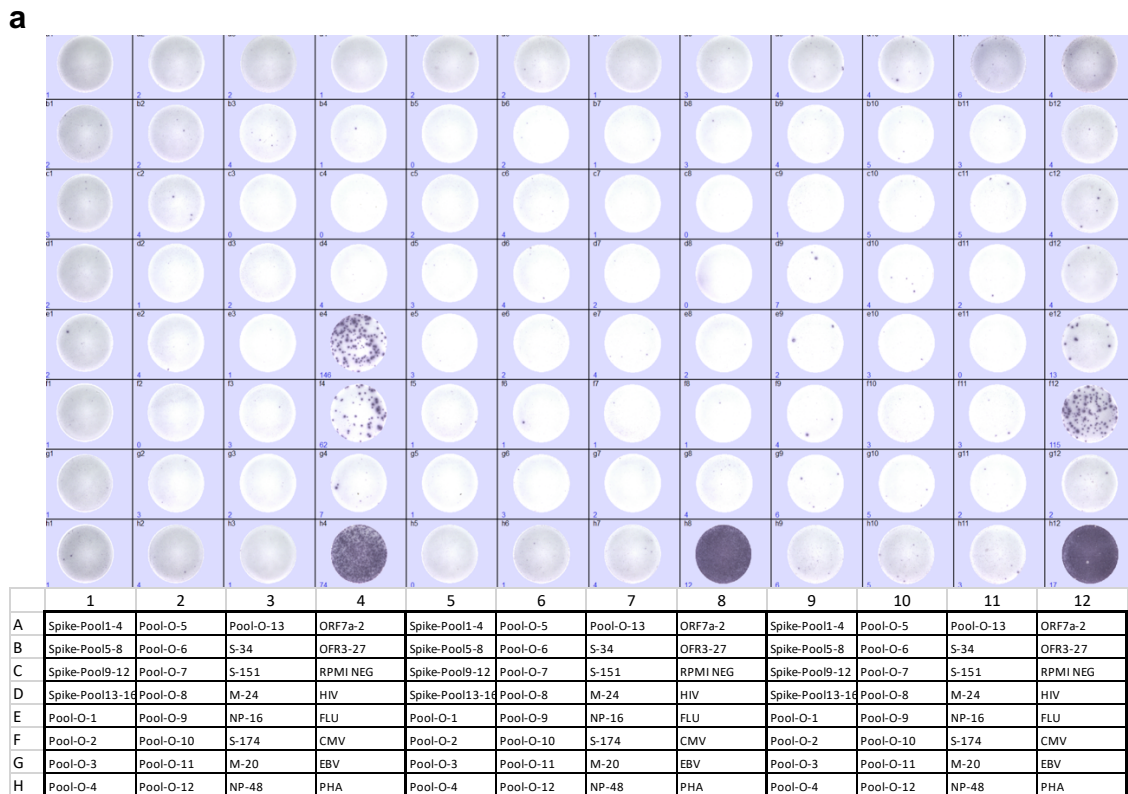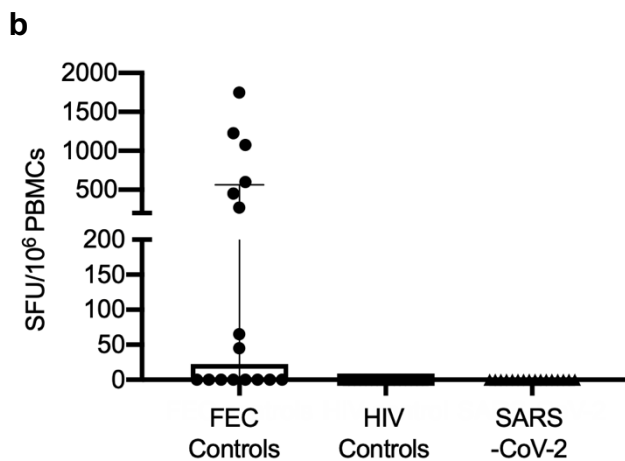

**Supplementary Fig. 4: Correlation between SARS-CoV-2 antigen-specific T cell responses and SARS-CoV-2 antigen-specific antibody responses.** a), b) and c) Correlation of Spike-, RBD-, and NP-specific antibody responses to corresponding antigen-specific T cell responses. d) Correlation between NP-specific antibody response and Spike-specific T cell response. n=42. Black and red dots represent patients with history of mild symptoms and severe symptoms, respectively. Spearman's rank correlation coefficient was used for the correlation analysis, two tailed p value was calculated.

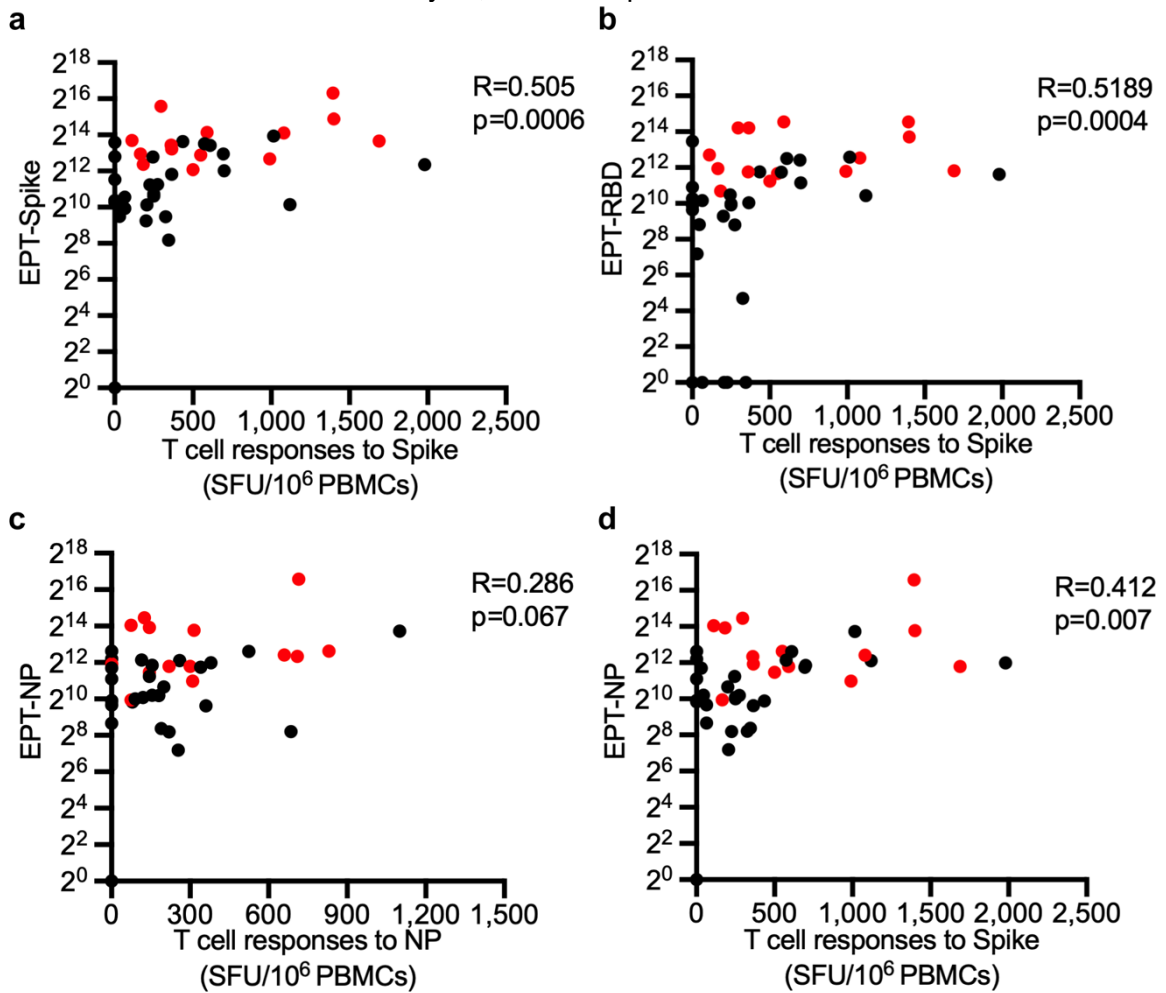

**Supplementary Fig. 5: Gating strategy of flow cytometry analysis.** a) Gating for CD4<sup>+</sup>/CD8<sup>+</sup> T cells. Cells were gated on single cell by a forward side scatter gate, followed by CD3/ CD4/CD8 gating excluding dead cells, CD14<sup>+</sup>, CD19<sup>+</sup>, and CD16<sup>+</sup> cells. This gating strategy was used for Fig. 4-7 and Supplementary Fig. 6. b) Gating for IFN $\gamma$ <sup>+/−</sup>, TNF $\alpha$ <sup>+/−</sup>, IL-2<sup>+/−</sup>, and CD107a<sup>+/−</sup> population were based on corresponding negative controls. This gating strategy was used for Fig. 4-5.

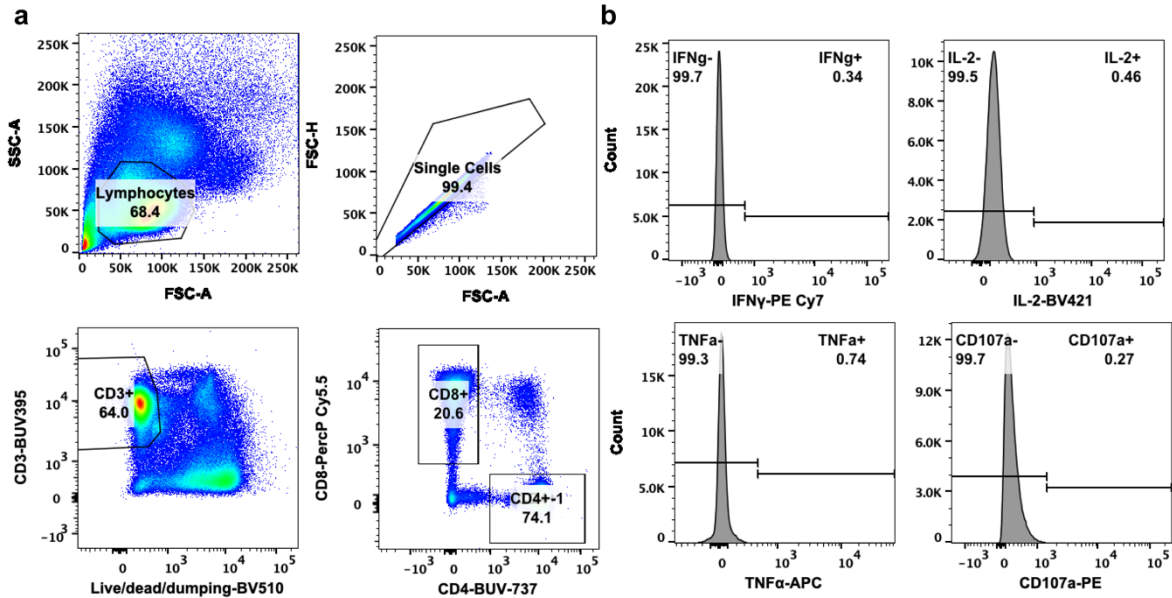

**Supplementary Fig. 6: Comparison of Cytokine production of T cells between the patients with different disease severity and T cells targeting different viral proteins.**

a) No significant difference in the percentage of CD4<sup>+</sup> and CD8<sup>+</sup> T cells producing IFN- $\gamma$  and/or TNF $\alpha$ , and/or IL-2 targeting each viral antigen between mild cases (n=14) and severe cases (n=8). Data are shown in value of median. b) No significant difference in proportion of multifunctional CD4<sup>+</sup> T cells targeting spike protein (Mild group, n=12; Severe group, n=8) and M/NP protein (Mild group, n=14; Severe group, n=8). Mann-Whitney test was used for the analysis. Two-tailed p value was calculated. N.S. P>0.05

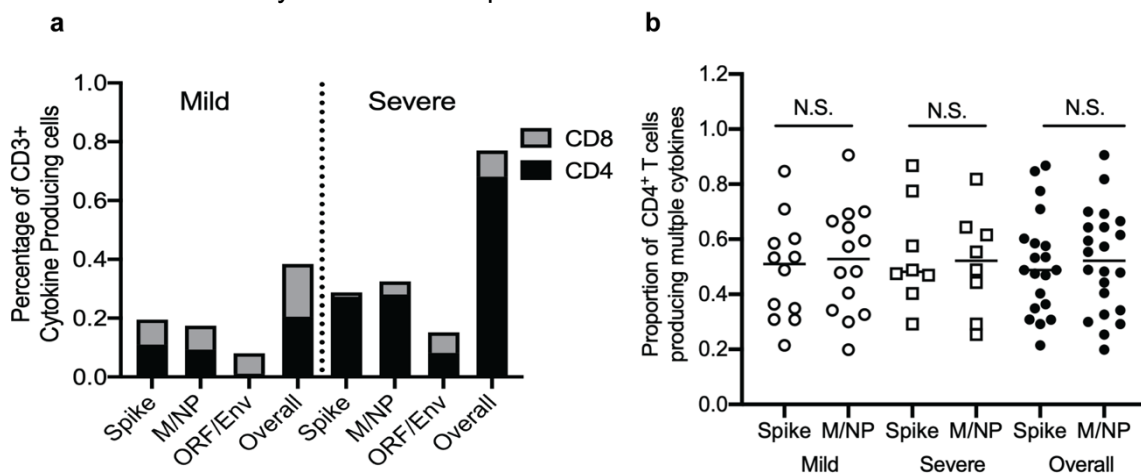

**Supplementary Fig. 7: Confirmation of dominant T cell responses with cultured short-term T cell lines.** Patient C-COV19-028 showed a CD4 T cell response to peptide S-34 and CD8 T cell response to peptide NP-51. Patient C-COV-19-038 showed CD4 T cell response to three dominant peptides: S-151 (weak), S-174, M24 and a CD8 T cell response to NP-16. Patient C-COV-19-039 showed CD4 T cell response to peptide S-E-19, whereas donor C-COV19-031 had a CD4 T cell response targeting peptide M-20. PBMCs were stimulated with corresponding peptide pools corresponding to the ex vivo ELISpot results and then cultured for 10 days. Cytokine production of the cell lines was then examined by ICS upon the stimulation with single peptides. Cells were gated on the live/singlet/ CD3+ Lymphocyte population.

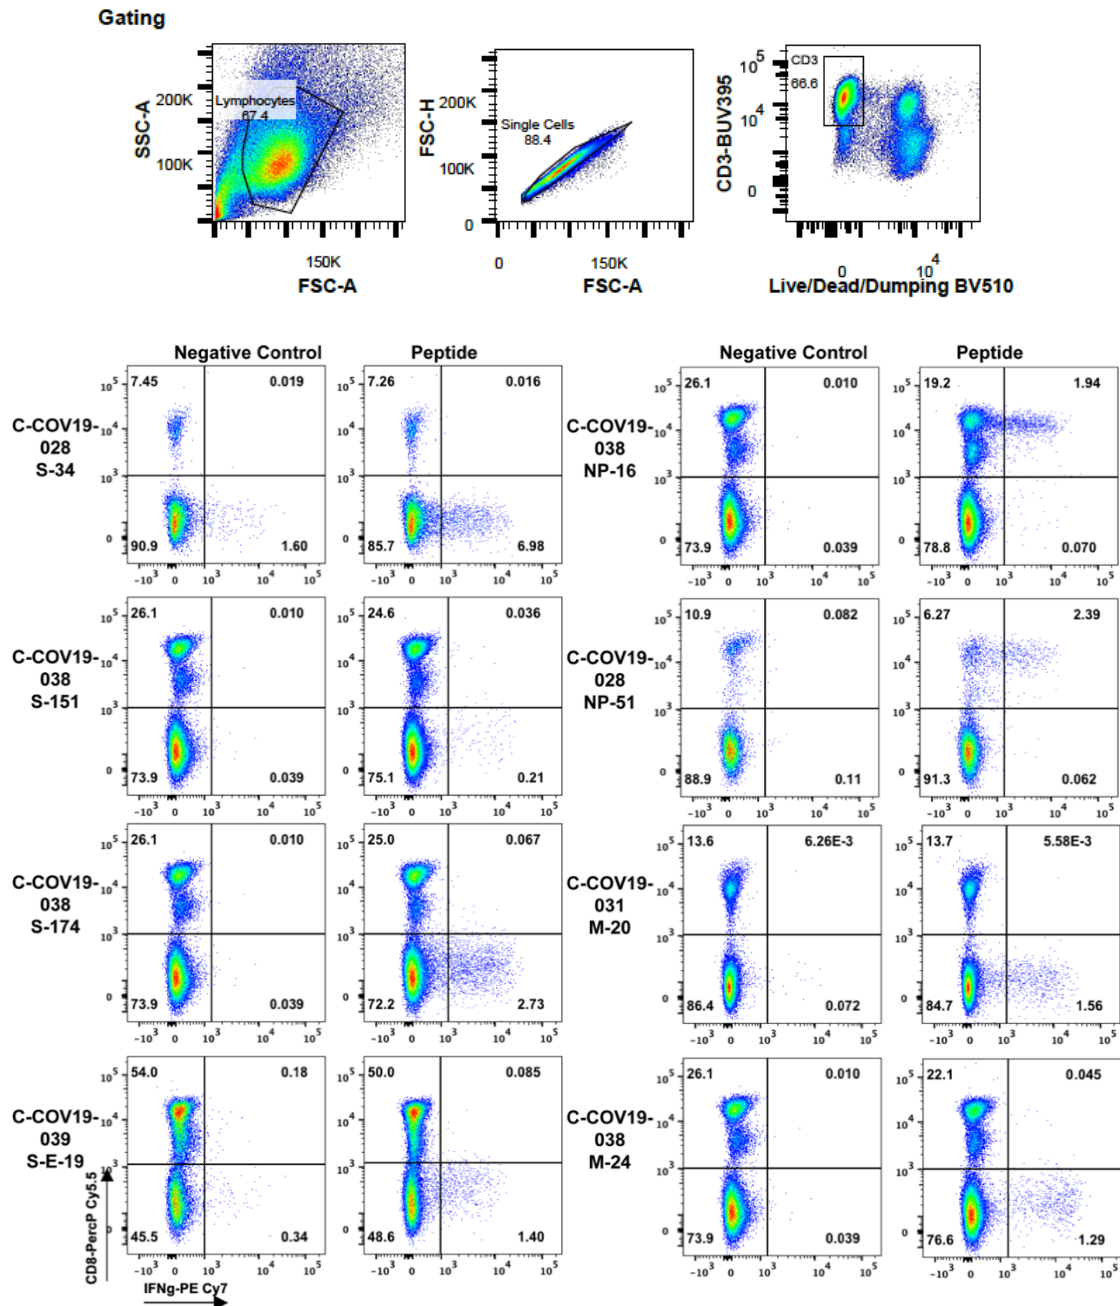

### Supplementary Table 1: Two-dimensional peptide Matrix pools.

a: Spike protein: 253 peptides in total 32 pools including 16 pools in 1<sup>st</sup> dimension and 16 pools in 2<sup>nd</sup> dimension

|         | Pool-17 | Pool-18 | Pool-19 | Pool-20 | Pool-21 | Pool-22 | Pool-23 | Pool-24 | Pool-25 | Pool-26 | Pool-27 | Pool-28 | Pool-29 | Pool-30 | Pool-31 | Pool-32 |
|---------|---------|---------|---------|---------|---------|---------|---------|---------|---------|---------|---------|---------|---------|---------|---------|---------|
| Pool 1  | S-1     | S-2     | S-3     | S-4     | S-5     | S-6     | S-7     | S-8     | S-9     | S-10    | S-11    | S-12    | S-13    | S-14    | S-15    | S-16    |
| Pool 2  | S-17    | S-18    | S-19    | S-20    | S-21    | S-22    | S-23    | S-24    | S-25    | S-26    | S-27    | S-28    | S-29    | S-30    | S-31    | S-32    |
| Pool 3  | S-33    | S-34    | S-35    | S-36    | S-37    | S-38    | S-39    | S-40    | S-41    | S-42    | S-43    | S-44    | S-45    | S-46    | S-47    | S-48    |
| Pool 4  | S-49    | S-50    | S-51    | S-52    | S-53    | S-54    | S-55    | S-56    | S-57    | S-58    | S-59    | S-60    | S-61    | S-62    | S-63    | S-64    |
| Pool 5  | S-65    | S-66    | S-67    | S-68    | S-69    | S-70    | S-71    | S-72    | S-73    | S-74    | S-75    | S-76    | S-77    | S-78    | S-79    | S-80    |
| Pool 6  | S-81    | S-82    | S-83    | S-84    | S-85    | S-86    | S-87    | S-88    | S-89    | S-90    | S-91    | S-92    | S-93    | S-94    | S-95    | S-96    |
| Pool 7  | S-97    | S-98    | S-99    | S-100   | S-101   | S-102   | S-103   | S-104   | S-105   | S-106   | S-107   | S-108   | S-109   | S-110   | S-111   | S-112   |
| Pool 8  | S-113   | S-114   | S-115   | S-116   | S-117   | S-118   | S-119   | S-120   | S-121   | S-122   | S-123   | S-124   | S-125   | S-126   | S-127   | S-128   |
| Pool 9  | S-129   | S-130   | S-131   | S-132   | S-133   | S-134   | S-135   | S-136   | S-137   | S-138   | S-139   | S-140   | S-141   | S-142   | S-143   | S-144   |
| Pool 10 | S-145   | S-146   | S-147   | S-148   | S-149   | S-150   | S-151   | S-152   | S-153   | S-154   | S-155   | S-156   | S-157   | S-158   | S-159   | S-160   |
| Pool 11 | S-161   | S-162   | S-163   | S-164   | S-165   | S-166   | S-167   | S-168   | S-169   | S-170   | S-171   | S-172   | S-173   | S-174   | S-175   | S-176   |
| Pool 12 | S-177   | S-178   | S-179   | S-180   | S-181   | S-182   | S-183   | S-184   | S-185   | S-186   | S-187   | S-188   | S-189   | S-190   | S-191   | S-192   |
| Pool 13 | S-193   | S-194   | S-195   | S-196   | S-197   | S-198   | S-199   | S-200   | S-201   | S-202   | S-203   | S-204   | S-205   | S-206   | S-207   | S-208   |
| Pool 14 | S-209   | S-210   | S-211   | S-212   | S-213   | S-214   | S-215   | S-216   | S-217   | S-218   | S-219   | S-220   | S-221   | S-222   | S-223   | S-224   |
| Pool 15 | S-225   | S-226   | S-227   | S-228   | S-229   | S-230   | S-231   | S-232   | S-233   | S-234   | S-235   | S-236   | S-237   | S-238   | S-239   | S-240   |
| Pool 16 | S-241   | S-242   | S-243   | S-244   | S-245   | S-246   | S-247   | S-248   | S-249   | S-250   | S-251   | S-252   | S-253   |         |         |         |

b: Non-spike proteins: total 29 pools, 13 pools in 1<sup>st</sup> dimension including ORF3a (35 peptides in 3 pools), ORF6 (7 peptides in 1 pool), ORF7a(15 peptides in 1 pool), ORF8(16 peptides in 1 pool), Envelope(9 peptides in 1 pool), Membrane Protein(29 peptides in 2 pools) and Nucleoprotein( 59 peptides in 4 pools).

|           | Pool-O-14 | Pool-O-15 | Pool-O-16 | Pool-O-17 | Pool-O-18 | Pool-O-19 | Pool-O-20 | Pool-O-21 | Pool-O-22 | Pool-O-23 | Pool-O-24 | Pool-O-25 | Pool-O-26 | Pool-O-27 | Pool-O-28 | Pool-O-29 |
|-----------|-----------|-----------|-----------|-----------|-----------|-----------|-----------|-----------|-----------|-----------|-----------|-----------|-----------|-----------|-----------|-----------|
| Pool-O-1  | ORF3a-1   | ORF3a-2   | ORF3a-3   | ORF3a-4   | ORF3a-5   | ORF3a-6   | ORF3a-7   | ORF3a-8   | ORF3a-9   | ORF3a-10  | ORF3a-11  | ORF3a-12  | ORF3a-13  | ORF3a-14  | ORF3a-15  | ORF3a-16  |
| Pool-O-2  | ORF3a-17  | ORF3a-18  | ORF3a-19  | ORF3a-20  | ORF3a-21  | ORF3a-22  | ORF3a-23  | ORF3a-24  | ORF3a-25  | ORF3a-26  | ORF3a-27  | ORF3a-28  | ORF3a-29  | ORF3a-30  | ORF3a-31  | ORF3a-32  |
| Pool-O-3  | ORF3a-33  | ORF3a-34  | ORF3a-35  |           |           |           |           |           |           |           |           |           |           |           |           |           |
| Pool-O-4  | ORF6-1    | ORF6-2    | ORF6-3    | ORF6-4    | ORF6-5    | ORF6-6    | ORF6-7    |           |           |           |           |           |           |           |           |           |
| Pool-O-5  | ORF7a-1   | ORF7a-2   | ORF7a-3   | ORF7a-4   | ORF7a-5   | ORF7a-6   | ORF7a-7   | ORF7a-8   | ORF7a-9   | ORF7a-10  | ORF7a-11  | ORF7a-12  | ORF7a-13  | ORF7a-14  | ORF7a-15  |           |
| Pool-O-6  | ORF8-1    | ORF8-2    | ORF8-3    | ORF8-4    | ORF8-5    | ORF8-6    | ORF8-7    | ORF8-8    | ORF8-9    | ORF8-10   | ORF8-11   | ORF8-12   | ORF8-13   | ORF8-14   | ORF8-15   | ORF8-16   |
| Pool-O-7  | Env-1     | Env-2     | Env-3     | Env-4     | Env-5     | Env-6     | Env-7     | Env-8     | Env-9     |           |           |           |           |           |           |           |
| Pool-O-8  | M-1       | M-2       | M-3       | M-4       | M-5       | M-6       | M-7       | M-8       | M-9       | M-10      | M-11      | M-12      | M-13      | M-14      | M-15      | M-16      |
| Pool-O-9  | M-17      | M-18      | M-19      | M-20      | M-21      | M-22      | M-23      | M-24      | M-25      | M-26      | M-27      | M-28      |           |           |           |           |
| Pool-O-10 | NP-1      | NP-2      | NP-3      | NP-4      | NP-5      | NP-6      | NP-7      | NP-8      | NP-9      | NP-10     | NP-11     | NP-12     | NP-13     | NP-14     | NP-15     | NP-16     |
| Pool-O-11 | NP-17     | NP-18     | NP-19     | NP-20     | NP-21     | NP-22     | NP-23     | NP-24     | NP-25     | NP-26     | NP-27     | NP-28     | NP-29     | NP-30     | NP-31     | NP-32     |
| Pool-O-12 | NP-33     | NP-34     | NP-35     | NP-36     | NP-37     | NP-38     | NP-39     | NP-40     | NP-41     | NP-42     | NP-43     | NP-44     | NP-45     | NP-46     | NP-47     | NP-48     |
| Pool-O-13 | NP-49     | NP-50     | NP-51     | NP-52     | NP-53     | NP-54     | NP-55     | NP-56     | NP-57     | NP-58     |           |           |           |           |           |           |

**Supplementary Table 2: HLA class I typing of CD8<sup>+</sup> epitope peptides in subjects with confirmed responses.** Each patient listed made a CD8 T cell response to the peptides shown. Optimal epitopes and the corresponding HLA-restriction were predicted by IEDB analysis tool (<http://tools.iedb.org/mhci>). Red highlights are the predicted optimal epitope sequences.

| Protein | Peptide ID                 | Peptide sequence             | Predicted HLA Restriction | Patients    | HLA       |           |          |          |          |          |
|---------|----------------------------|------------------------------|---------------------------|-------------|-----------|-----------|----------|----------|----------|----------|
|         |                            |                              |                           |             | A1        | A2        | B1       | B2       | Cw1      | Cw2      |
| NP      | NP-1                       | MSDNGPQN <b>QRNAPRITF</b>    | B*2705/06                 | C-COV19-044 | 02:07     | 11:01     | 27:06    | 40:01    | 03:04    | 07:02    |
|         | NP-2                       | <b>NQRNAPRITF</b> GGPSDSTG   |                           | C-COV19-047 | 24:02     | 24:02     | 27:05    | 27:05    | 01:02    | 02:02    |
|         |                            |                              |                           | C-COV19-025 | 02:01     | 24:02     | 27:05    | 44:02    | 02:02    | 05:01/03 |
|         | NP-16                      | <b>LSPRWYFY</b> YLTGTGPEAGL  |                           | C-COV19-001 | 02:01     | 23:01     | 07:02    | 49:01    | 07:01    | 07:02    |
|         |                            |                              |                           | C-COV19-002 | 03:01     | 68:02     | 07:02    | 49:01    | 06:02    | 07:02    |
|         |                            |                              |                           | C-COV19-003 | 02:01     | 32:01     | 07:02    | 44:02    | 05:01/03 | 07:02    |
|         |                            |                              |                           | C-COV19-004 | 02:01     | 02:01     | 07:02    | 40:01    | 03:04    | 07:02    |
|         |                            |                              |                           | C-COV19-005 | 01:01/04N | 02:01     | 07:02    | 40:01    | 01:02    | 07:02    |
|         |                            |                              |                           | C-COV19-006 | 01:01/04N | 29:02     | 07:02    | 45:01    | 07:01    | 07:02    |
|         |                            |                              |                           | C-COV19-007 | 01:01/04N | 01:01/04N | 07:02    | 07:02    | 07:02    | 07:02    |
|         |                            |                              |                           | C-COV19-035 | 11:01     | 11:01     | 07:02    | 07:05/06 | 03:04    | 07:02    |
|         |                            |                              |                           | C-COV19-036 | 01:01/04N | 03:01     | 07:02    | 52:01    | 07:02    | 12:02    |
|         |                            |                              |                           | C-COV19-038 | 02:01     | 24:02     | 07:02    | 51:01    | 04:01    | 07:02    |
|         | C-COV19-045                | 01:01/04N                    | 02:01                     | 07:02       | 45:01     | 06:02     | 07:02    |          |          |          |
|         | C-COV19-046                | 02:01                        | 03:01                     | 07:02       | 44:02     | 05:01/03  | 07:02    |          |          |          |
| NP-E-3  | MEVTPSGT <b>WL</b>         | B*4001                       | C-COV19-021               | 02:01       | 31:01     | 40:01     | 40:01    | 03:04    | 03:04    |          |
| NP-51   | LLNKHIDAY <b>KTFPPTEPK</b> | A*0301                       | C-COV19-028               | 02:01       | 03:01     | 15:01     | 44:02    | 03:03    | 07:04/11 |          |
|         |                            |                              | C-COV19-036               | 01:01/04N   | 03:01     | 07:02     | 52:01    | 07:02    | 12:02    |          |
| NP-51   | LLNKHIDAY <b>KTFPPTEPK</b> | A*1101                       | C-COV19-035               | 11:01       | 11:01     | 07:02     | 07:05/06 | 03:04    | 07:02    |          |
| ORF     | ORF3a-27                   | KDCVVLHSY <b>FTSDYYQLY</b>   | A*0101                    | C-COV19-022 | 01:01/04N | 01:01/04N | 08:01    | 08:01    | 07:01    | 07:02    |
|         | ORF3a-28                   | <b>YFTSDYYQLY</b> STQLSTDTGV |                           | C-COV19-036 | 01:01/04N | 03:01     | 07:02    | 52:01    | 07:02    | 12:02    |
|         |                            |                              |                           | C-COV19-037 | 01:01/04N | 26:01     | 08:01    | 38:01    | 07:01    | 12:03    |
|         |                            |                              |                           | C-COV19-040 | 01:04N    | 03:01     | 27:05    | 57:01    | 01:02    | 06:02    |
| Spike   | S-34                       | CTF <b>EYVSQPFL</b> MDLE     | Cw*0702                   | C-COV19-035 | 11:01     | 11:01     | 07:02    | 07:05/06 | 03:04    | 07:02    |
|         | S-106                      | GPK <b>KSTNLVKNK</b> CVN     | A*3101                    | C-COV19-021 | 02:01     | 31:01     | 40:01    | 40:01    | 03:04    | 03:04    |

**Supplementary Table 3: Known SARS epitopes with identical sequences to SARS-CoV-2 , and Tetramers/Pentamers.** Red highlights the epitope responses detected in the patients who had recovered from COVID-19, whether by tetramer/pentamer staining or ELISpot assay.

| Peptide ID    | Epitope                    | Protein      | MHC allele                   | Tetramer/Pentamer |
|---------------|----------------------------|--------------|------------------------------|-------------------|
| N-E-01        | ILLNKHID                   | NP           | HLA-A*02:01                  | Y                 |
| N-E-02        | AFFGMSRIGMEVTPSGTW         | NP           | NA                           |                   |
| <b>N-E-03</b> | <b>MEVTPSGTWL</b>          | <b>NP</b>    | <b>HLA-B*40:01 I</b>         | <b>Y</b>          |
| N-E-04        | GMSRIGMEV                  | NP           | HLA-A*02:01 I                | Y                 |
| N-E-05        | ILLNKHIDA                  | NP           | HLA-A*02:01 I                | Y                 |
| N-E-06        | ALNTPKDHI                  | NP           | HLA-A*02:01 I                | Y                 |
| N-E-07        | IRQGTDYKHWPQIAQFA          | NP           | NA                           |                   |
| N-E-08        | KHWPQIAQFAPSASAFF          | NP           | NA                           |                   |
| N-E-09        | LALLLDRL                   | NP           | HLA-A*02:01 I                | Y                 |
| N-E-10        | LLDRLNQL                   | NP           | HLA-A*02:01 I                | Y                 |
| <b>N-E-11</b> | <b>LLNKHIDAYKTFPPTPEPK</b> | <b>NP</b>    | <b>NA</b>                    |                   |
| N-E-12        | LQLPQGTTL                  | NP           | HLA-A*02:01 I                | Y                 |
| N-E-13        | AQFAPSASAFFGMSR            | NP           | NA                           |                   |
| N-E-14        | AQFAPSASAFFGMSRIGM         | NP           | NA                           |                   |
| N-E-15        | RRPQGLPNNTASWFT            | NP           | NA I                         |                   |
| N-E-16        | YKTFPPTPEPKDKKKK           | NP           | NA                           |                   |
| S-E-17        | GAALQIPFAMQMAYRF           | Spike        | HLA-DRA*01:01,HLA-DRB1*07:01 | Y                 |
| S-E-18        | MAYRFNGIGVTQNVLY           | Spike        | HLA-DRB1*04:01               | Y                 |
| <b>S-E-19</b> | <b>QLIRAAEIRASANLAATK</b>  | <b>Spike</b> | <b>HLA-DRB1*04:01</b>        | <b>Y</b>          |
| S-E-20        | FIAGLIAIV                  | Spike        | HLA-A*02:01                  | Y                 |
| S-E-21        | ALNTLVKQL                  | Spike        | HLA-A*02:01 I                | Y                 |
| S-E-22        | LITGRLQSL                  | Spike        | HLA-A2 I                     | Y                 |
| S-E-23        | NLNESLIDL                  | Spike        | HLA-A*02:01 I                | Y                 |
| S-E-24        | QALNTLVKQLSSNFGAI          | Spike        | HLA-DRB1*04:01               | Y                 |
| S-E-25        | RLNEVAKNL                  | Spike        | HLA-A*02:01 I                | Y                 |
| S-E-26        | VLNDILSRL                  | Spike        | HLA-A*02:01 I                | Y                 |
| S-E-27        | VVFLHVTYV                  | Spike        | HLA-A*02:01 I                | Y                 |



#### **Supplementary Table 4:**

##### **Oxford Immunology Network Covid-19 response: T cell Immunity Team – additional contributors**

Barbara Kronsteiner, Anthony Brown, Emily Adland, Patpong Rongkard, Anna Csala, Helen Brown, Nicola Robinson, Panagiota Zacharopoulou, Vinicius Adriano, Prabhjeet Phalora, Oliver Sampson, Carl-Philipp Hackstein, Nicholas Lim, Matt Edmans, Senthil Chinnakannan, Rachael Brown, Ali Amini, Mathew Jones, Mohammad Ali, Timothy Donnison, Matt Pace, Ane Ogbe, Donal Skelly, Lizzie Stafford, Helen Fletcher, Lian Lee, Prathiba Kurupati, Rachel Etherington, Nicholas Provine, Hashem Koohy, Chloe Hyun-Jung Lee

#### **Supplementary Table 5: ISARIC 4C Investigators**

**Consortium Lead Investigator:** J Kenneth Baillie,

**Chief Investigator:** Malcolm G Semple

**Co-Lead Investigator:** Peter JM Openshaw.

**ISARIC Clinical Coordinator:** Gail Carson.

**Co-Investigators:** Beatrice Alex, Benjamin Bach, Wendy S Barclay, Debby Bogaert, Meera Chand, Graham S Cooke, Annemarie B Docherty, Jake Dunning, Ana da Silva Filipe, Tom Fletcher, Christopher A Green, Ewen M Harrison, Julian A Hiscox, Antonia Ying Wai Ho, Peter W Horby, Samreen Ijaz, Saye Khoo, Paul Klenerman, Andrew Law, Wei Shen Lim, Alexander, J Mentzer, Laura Merson, Alison M Meynert, Mahdad Noursadeghi, Shona C Moore, Massimo Palmarini, William A Paxton, Georgios Pollakis, Nicholas Price, Andrew Rambaut, David L Robertson, Clark D Russell, Vanessa Sancho-Shimizu, Janet T Scott, Louise Sigfrid, Tom Solomon, Shiranee Sriskandan, David Stuart, Charlotte Summers, Richard S Tedder, Emma C Thomson, Ryan S Thwaites, Lance CW Turtle, Maria Zambon. Project Managers Hayley Hardwick, Chloe Donohue, Jane Ewins, Wilna Oosthuyzen, Fiona Griffiths. Data Analysts: Lisa Norman, Riinu Pius, Tom M Drake, Cameron J Fairfield, Stephen Knight, Kenneth A Mclean, Derek Murphy, Catherine A Shaw. Data and Information System Manager: Jo Dalton, Michelle Girvan, Egle Saviciute, Stephanie Roberts Janet Harrison, Laura Marsh, Marie Connor. Data integration and presentation: Gary Leeming, Andrew Law, Ross Hendry. Material Management: William Greenhalf, Victoria Shaw, Sarah McDonald. Outbreak Laboratory Volunteers: Katie A. Ahmed, Jane A Armstrong, Milton Ashworth, Innocent G Asiimwe, Siddharth Bakshi, Samantha L Barlow, Laura Booth, Benjamin Brennan, Katie Bullock, Benjamin WA Catterall, Jordan J Clark, Emily A Clarke, Sarah Cole, Louise Cooper, Helen Cox, Christopher Davis, Oslem Dincarslan, Chris Dunn, Philip Dyer, Angela Elliott, Anthony Evans, Lewis WS Fisher, Terry Foster, Isabel Garcia-Dorival, William Greenhalf, Philip Gunning, Catherine Hartley, Antonia Ho, Rebecca L Jensen, Christopher B Jones, Trevor R Jones, Shadia Khandaker, Katharine King, Robyn T. Kiy, Chrysa Koukorava, Annette Lake, Suzannah Lant, Diane Latawicz, L Lavelle-Langham, Daniella Lefteri, Lauren Lett, Lucia A Livoti, Maria Mancini, Sarah McDonald, Laurence McEvoy, John McLauchlan, Soeren Metelmann, Nahida S Miah, Joanna Middleton, Joyce Mitchell, Shona C Moore, Ellen G Murphy, Rebekah Penrice-Randal, Jack Pilgrim, Tessa Prince, Will Reynolds, P. Matthew Ridley, Debby Sales, Victoria E Shaw, Rebecca K Shears, Benjamin Small, Krishanthi S Subramaniam, Agnieska Szemiel, Aislynn Taggart, Jolanta Tanianis, Jordan Thomas, Erwan Trochu, Libby van Tonder, Eve Wilcock, J. Eunice Zhang. Local Principal Investigators: Kayode Adeniji, Daniel Agranoff, Ken Agwuh, Dhiraj Ail, Ana Alegria, Brian Angus, Abdul Ashish, Dougal Atkinson, Shahedal Bari, Gavin Barlow, Stella Barnass, Nicholas Barrett, Christopher Bassford, David Baxter, Michael Beadsworth, Jolanta Bernatoniene, John Berridge, Nicola Best, Pieter Bothma, David Brealey, Robin Brittain-Long, Naomi Bulteel, Tom Burden, Andrew Burtenshaw, Vikki Caruth, David Chadwick, Duncan Chamblor, Nigel Chee, Jenny Child, Srikanth Chukkambotla, Tom Clark, Paul Collini, Catherine Cosgrove, Jason Cupitt, Maria-Teresa Cutino-Moguel, Paul Dark, Chris Dawson, Samir Dervisevic, Phil Donnison, Sam Douthwaite, Ingrid DuRand,

Ahilanadan Dushianthan, Tristan Dyer, Cariad Evans , Chi Eziefula, Chrisopher Fegan, Adam Finn, Duncan Fullerton, Sanjeev Garg, Sanjeev Garg, Atul Garg, Jo Godden, Arthur Goldsmith, Clive Graham, Elaine Hardy, Stuart Hartshorn, Daniel Harvey, Peter Havalda, Daniel B Hawcutt, Maria Hobrok, Luke Hodgson, Anita Holme, Anil Hormis, Michael Jacobs, Susan Jain, Paul Jennings, Agilan Kaliappan, Vidya Kasipandian, Stephen Kegg, Michael Kelsey, Jason Kendall, Caroline Kerrison, Ian Kerslake, Oliver Koch, Gouri Koduri, George Koshy , Shondipon Laha, Susan Larkin, Tamas Leiner, Patrick Lillie, James Limb, Vanessa Linnett, Jeff Little, Michael MacMahon, Emily MacNaughton, Ravish Mankregod, Huw Masson , Elijah Matovu, Katherine McCullough, Ruth McEwen , Manjula Meda, Gary Mills , Jane Minton, Mariyam Mirfenderesky, Kavya Mohandas, Quen Mok, James Moon, Elinoor Moore, Patrick Morgan, Craig Morris, Katherine Mortimore, Samuel Moses, Mbiye Mpenge, Rohinton Mulla, Michael Murphy, Megan Nagel, Thapas Nagarajan, Mark Nelson, Igor Otahal, Mark Pais, Selva Panchatsharam, Hassan Paraiso, Brij Patel, Justin Pepperell, Mark Peters, Mandeep Phull , Stefania Pintus, Jagtur Singh Pooni, Frank Post, David Price, Rachel Prout, Nikolas Rae, Henrik Reschreiter, Tim Reynolds, Neil Richardson, Mark Roberts, Devender Roberts, Alistair Rose, Guy Rousseau, Brendan Ryan, Taranprit Saluja, Aarti Shah, Prad Shanmuga, Anil Sharma, Anna Shawcross, Jeremy Sizer, Richard Smith, Catherine Snelson, Nick Spittle, Nikki Staines , Tom Stambach, Richard Stewart, Pradeep Subudhi, Tamas Szakmany, Kate Tatham, Jo Thomas, Chris Thompson, Robert Thompson, Ascanio Tridente, Darell Tupper - Carey, Mary Twagira, Andrew Ustianowski, Nick Vallotton, Lisa Vincent-Smith, Shico Visuvanathan , Alan Vuylsteke, Sam Waddy, Rachel Wake, Andrew Walden, Ingeborg Welters, Tony Whitehouse, Paul Whittaker, Ashley Whittington, Meme Wijesinghe, Martin Williams, Lawrence Wilson, Sarah Wilson, Stephen Winchester, Martin Wiselka, Adam Wolverson, Daniel G Wooton, Andrew Workman, Bryan Yates, Peter Young.
